# Supplementary material for: Sorghum Flour Features Related to Dry Heat Treatment and Milling
Source: Foods. 2023 Jun 2;12(11):2248. doi: 10.3390/foods12112248 (PMC10252988; doi:10.3390/foods12112248)
Supplement: Supplementary file 1 [file foods-12-02248-s001.zip › foods-2399066-table S1.pdf]

**Table S1.** The D-optimal design and experimentally determined values of targeted responses: Protein (R1); Fat (R2); Ash (R3); Moisture (R4); Carbohydrates (R5), Fiber (R6), WAC (R7); OAC (R8); SP (R9) and EA (R10).

| Run | A:<br>Treatment<br>(°C) | B:<br>Particle size<br>(µm) | R1:<br>Protein<br>(%) | R2:<br>Fat<br>(%) | R3:<br>Ash<br>(%) | R4:<br>Moisture<br>(%) | R5:<br>Carbohydrates<br>(%) | R6:<br>Fiber<br>(%) | R7:<br>WAC<br>(%) | R8:<br>OAC<br>(%) | R9:<br>SP<br>(g/g) | R10:<br>EA<br>(%) |
|-----|-------------------------|-----------------------------|-----------------------|-------------------|-------------------|------------------------|-----------------------------|---------------------|-------------------|-------------------|--------------------|-------------------|
| 1   | 121.00                  | 200.00                      | 8.51                  | 4.04              | 1.91              | 8.94                   | 68.58                       | 8.02                | 191.10            | 170.99            | 3.68               | 43.50             |
| 2   | 121.00                  | 300.00                      | 11.48                 | 1.16              | 0.66              | 8.80                   | 67.14                       | 10.75               | 226.80            | 160.00            | 3.37               | 55.50             |
| 3   | 121.00                  | 300.00                      | 11.46                 | 1.12              | 0.65              | 8.78                   | 66.16                       | 9.80                | 226.23            | 159.52            | 3.37               | 54.78             |
| 4   | 121.00                  | 250.00                      | 9.29                  | 3.40              | 1.52              | 8.75                   | 68.65                       | 8.38                | 210.08            | 168.16            | 3.60               | 46.50             |
| 5   | 121.00                  | 250.00                      | 9.26                  | 3.37              | 1.51              | 8.74                   | 68.26                       | 7.98                | 209.12            | 167.45            | 3.59               | 45.78             |
| 6   | 140.00                  | 250.00                      | 9.21                  | 3.40              | 1.64              | 9.07                   | 69.03                       | 7.64                | 210.08            | 167.27            | 3.42               | 44.50             |
| 7   | 121.00                  | 300.00                      | 11.51                 | 1.20              | 0.67              | 8.82                   | 68.12                       | 11.70               | 227.37            | 160.48            | 3.37               | 56.22             |
| 8   | 140.00                  | 200.00                      | 8.93                  | 4.13              | 1.97              | 8.96                   | 67.05                       | 8.95                | 210.08            | 170.09            | 3.79               | 40.50             |
| 9   | 121.00                  | 250.00                      | 9.32                  | 3.43              | 1.53              | 8.76                   | 69.04                       | 8.78                | 211.04            | 168.87            | 3.61               | 47.22             |
| 10  | 121.00                  | 200.00                      | 8.48                  | 3.98              | 1.88              | 8.93                   | 68.48                       | 8.01                | 190.11            | 170.38            | 3.67               | 42.78             |
| 11  | 140.00                  | 250.00                      | 9.16                  | 3.37              | 1.63              | 9.06                   | 68.74                       | 7.38                | 209.51            | 166.40            | 3.42               | 43.78             |
| 12  | 140.00                  | 200.00                      | 8.90                  | 4.10              | 1.96              | 8.95                   | 66.53                       | 8.44                | 208.67            | 169.15            | 3.79               | 39.78             |
| 13  | 121.00                  | 200.00                      | 8.54                  | 4.10              | 1.94              | 8.95                   | 68.68                       | 8.03                | 192.09            | 171.60            | 3.69               | 44.22             |
| 14  | 140.00                  | 300.00                      | 9.93                  | 1.62              | 0.93              | 8.82                   | 70.58                       | 8.11                | 224.76            | 153.65            | 3.32               | 55.00             |
| 15  | 140.00                  | 200.00                      | 8.96                  | 4.16              | 1.98              | 8.97                   | 67.57                       | 9.46                | 211.49            | 171.03            | 3.79               | 41.22             |
| 16  | 140.00                  | 250.00                      | 9.26                  | 3.43              | 1.65              | 9.08                   | 69.32                       | 7.90                | 210.65            | 168.14            | 3.42               | 45.22             |
| 17  | 140.00                  | 300.00                      | 9.88                  | 1.59              | 0.92              | 8.80                   | 69.91                       | 7.43                | 219.05            | 152.99            | 3.32               | 53.59             |
| 18  | 140.00                  | 300.00                      | 9.98                  | 1.65              | 0.94              | 8.84                   | 71.25                       | 8.79                | 230.47            | 154.31            | 3.32               | 56.41             |

A—treatment temperature factor, B—particle size factor; WAC— water absorption capacity, OAC—oil-absorption capacity, SP—swelling power, EA—emulsion activity.
